# Supplementary material for: RETRACTED ARTICLE: Amphiregulin enhances cardiac fibrosis and aggravates cardiac dysfunction in mice with experimental myocardial infarction partly through activating EGFR-dependent pathway
Source: Springer Nature journal article supplement (doi:10.1007/s00395-018-0669-y), 2018-01-18
Supplement: MOESM1 [file 15425454]

**Supplementary Fig.1**
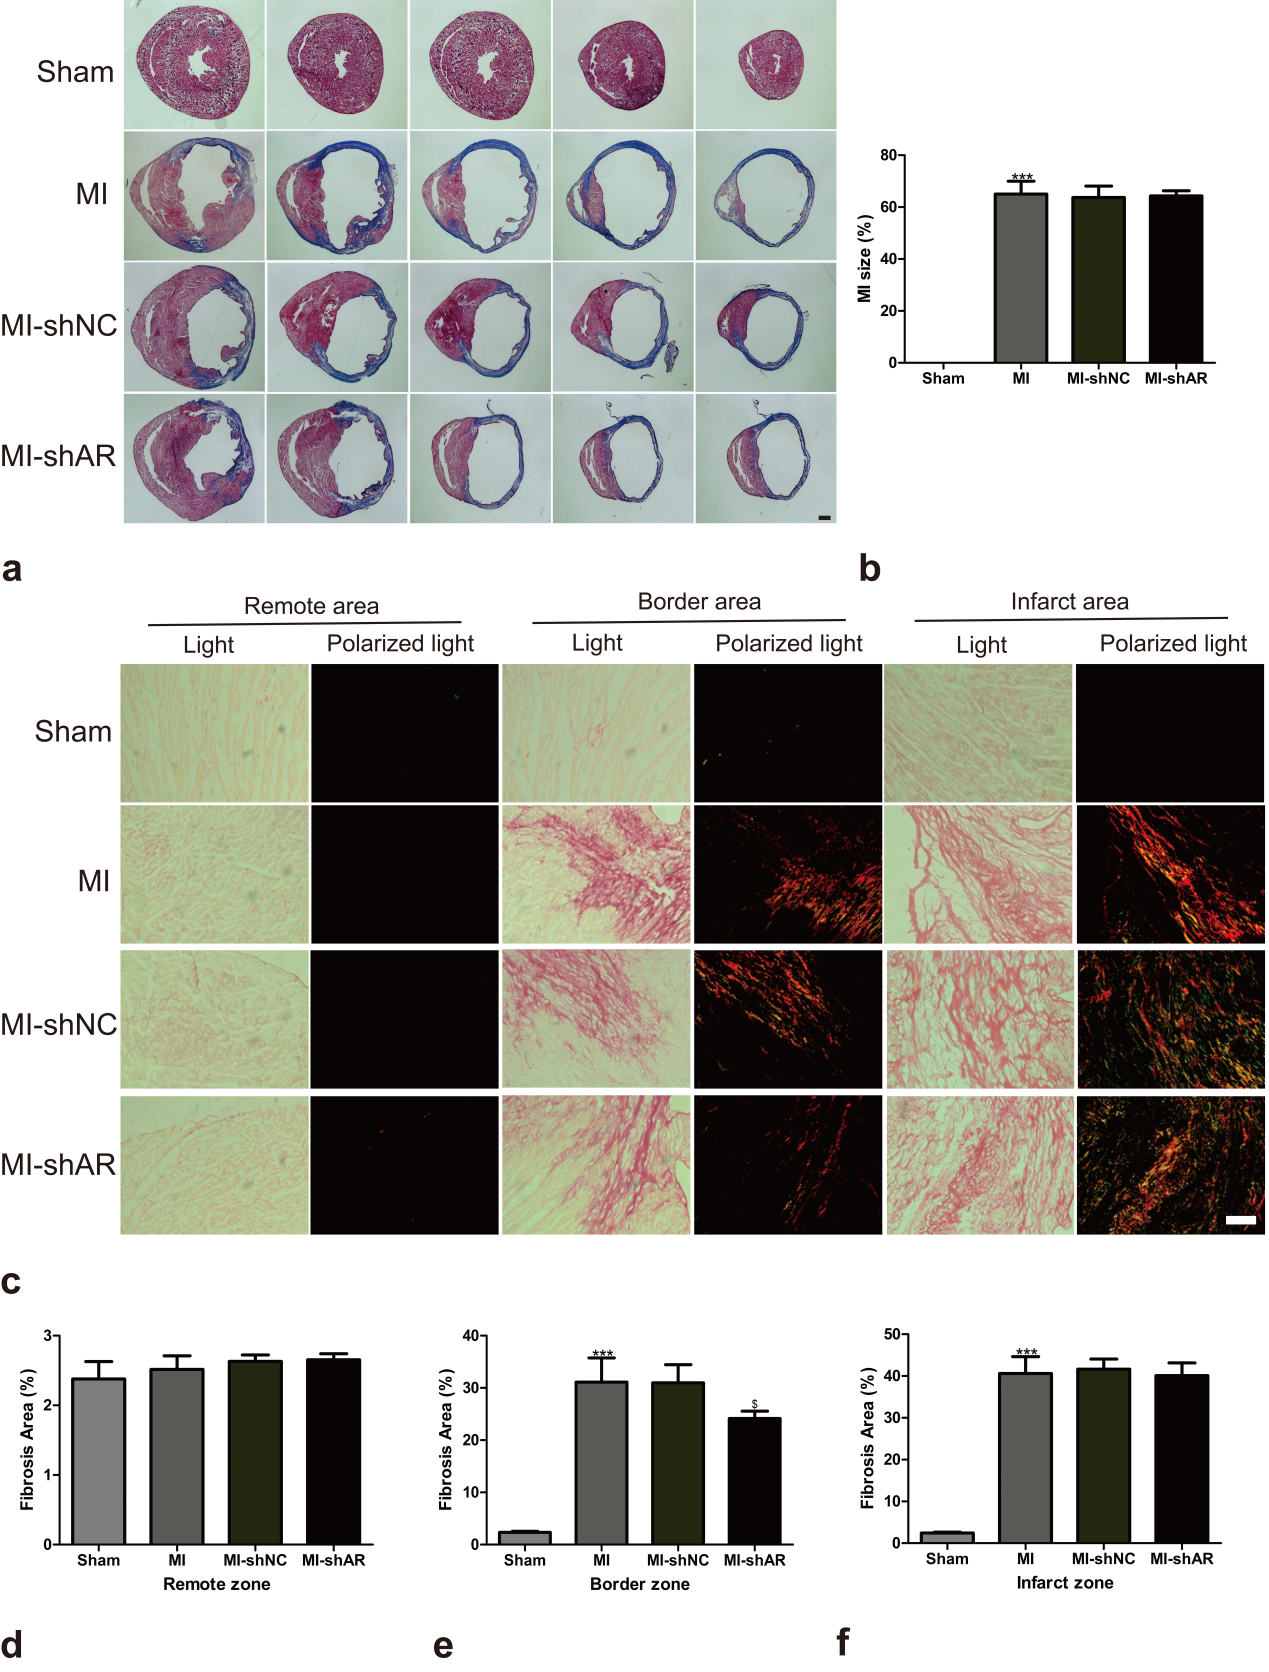


**Fig. 1** AR knock-down shrunk MI size and alleviated CF in matched MI mice of three groups. After matching the MI size by Masson’s trichrome staining, 4 mice in MI and MI-shNC group and 5 mice in MI group had the similar MI size. Then the myocardium of three different zones in those mice was harvested at day 28 post MI for following study. (a, b) The MI size in mice of three groups has the similar MI size. (c-f) Compared with MI and MI-shNC group, the CF of infarct border zone in MI-shAR was notably decreased. However, no significant difference was found in infarct and remote zone in mice of three groups. ***P<0.001 vs. the Sham group and $P<0.001 vs. the MI group.Transverse line =1mm for a and Transverse line=100μm for c.

**Supplementary Fig.2**
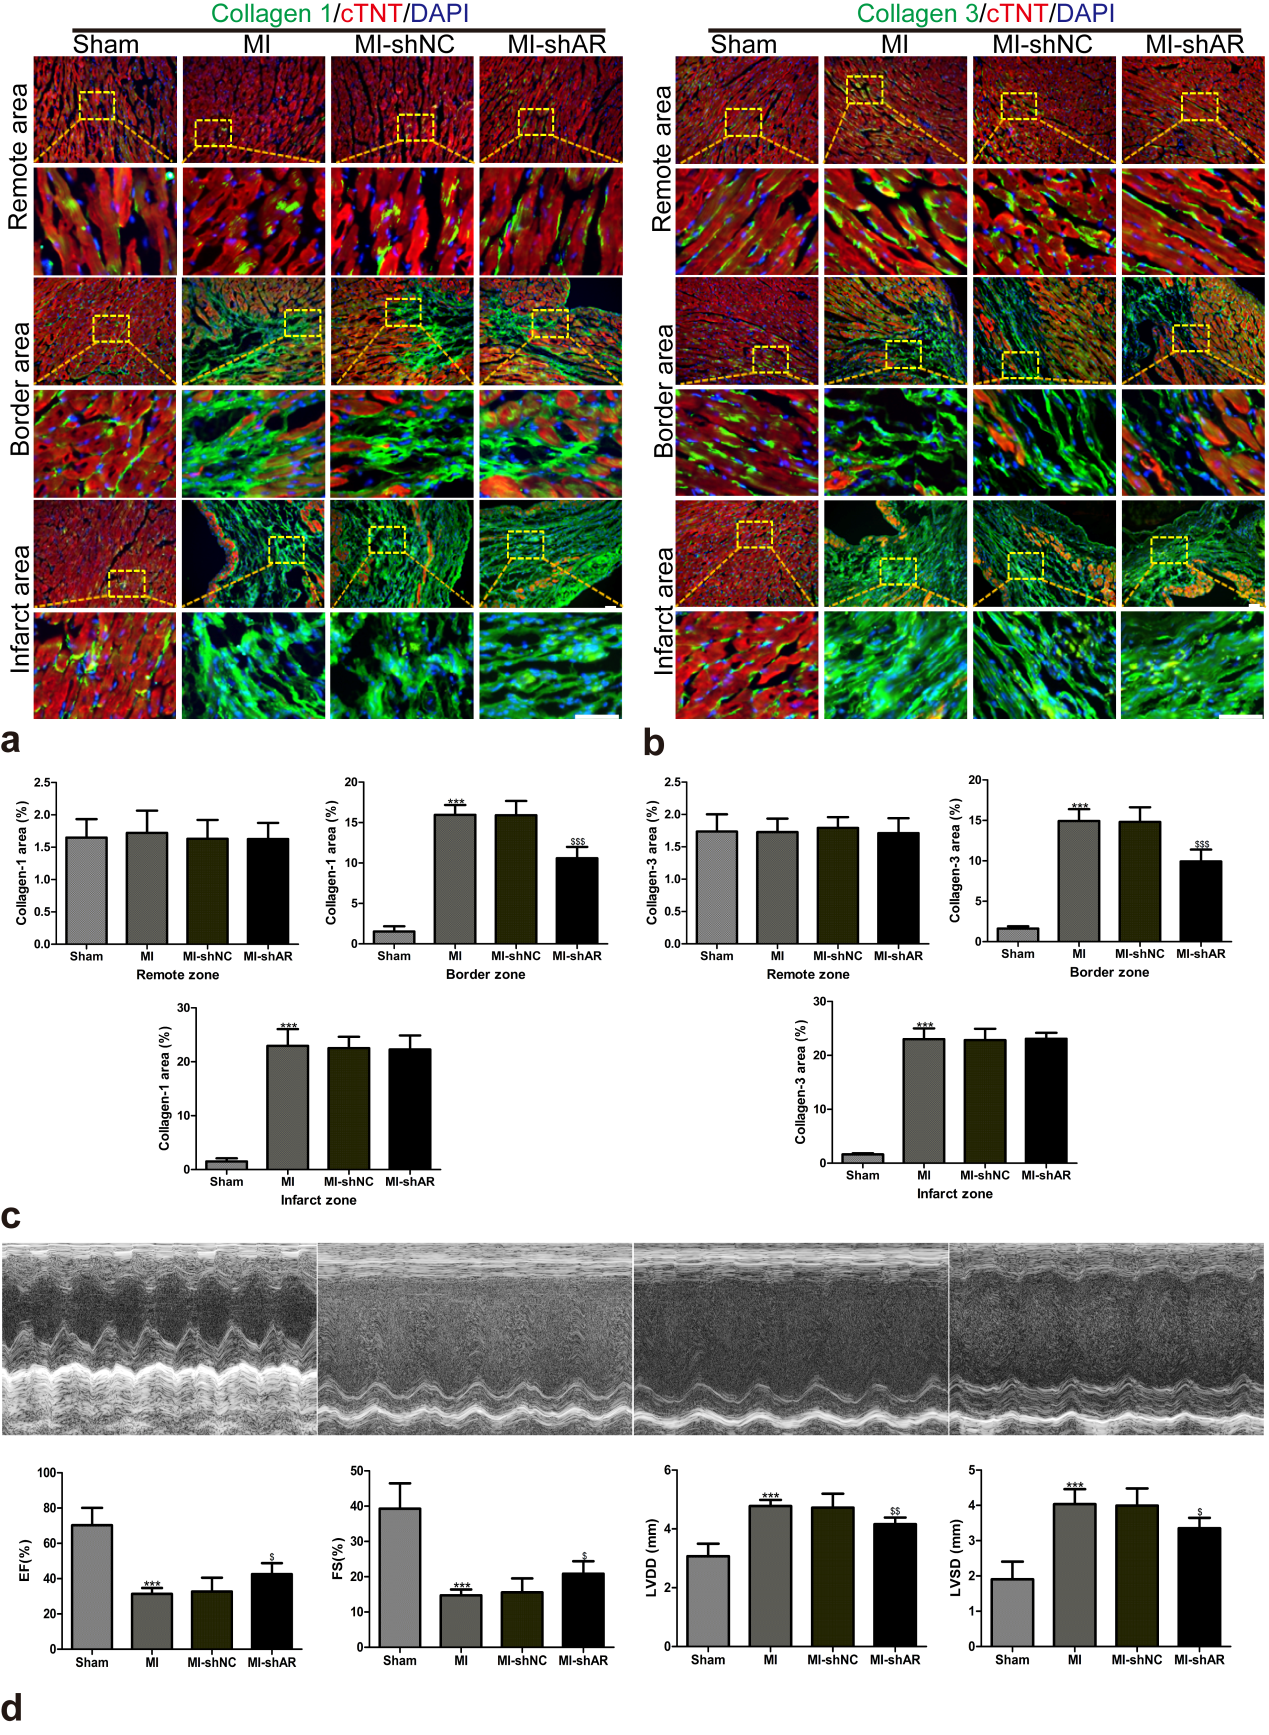


**Fig. 2** AR knock-down reduced the expression of collagen-1, collagen-3 and enhanced the cardiac function in matched mice of three groups. Mouse grouping was consistent with above. (a-c) Compared with MI and MI –shNC mice, the expression of collagen-1, collagen-3 in infarct border zone were both attenuated in MI-shAR mice. (d) Representative M-mode echocardiograms obtained at 28th day post-MI. Cardiac function was enhanced in MI-shAR group at day 28 by detecting EF%, FS%, LVDD and LVSD post MI.**P<0.01; and ***P<0.001 vs. the control group and $p<0.05 ; $$P<0.01 and $$$P<0.001 vs. the MI group.Transverse line=100μm.
